# Supplementary material for: The effect of molecular weight on the porosity of hypercrosslinked polystyrene
Source: Royal Society of Chemistry journal article supplement (doi:10.1039/c5py00668f), 2015-01-01
Supplement: c5py00668f1.pdf [file c5py00668f1.pdf]

## The Effect of Molecular Weight on the Porosity of Hypercrosslinked Polystyrene

Thanchanok Ratvijitvech,<sup>a</sup> Michael Barrow,<sup>a</sup> Andrew I. Cooper<sup>a</sup> and Dave J. Adams<sup>a,\*</sup>

<sup>a</sup> Department of Chemistry, University of Liverpool, Crown Street, Liverpool, L69 7ZD, U.K

### SUPPORTING INFORMATION

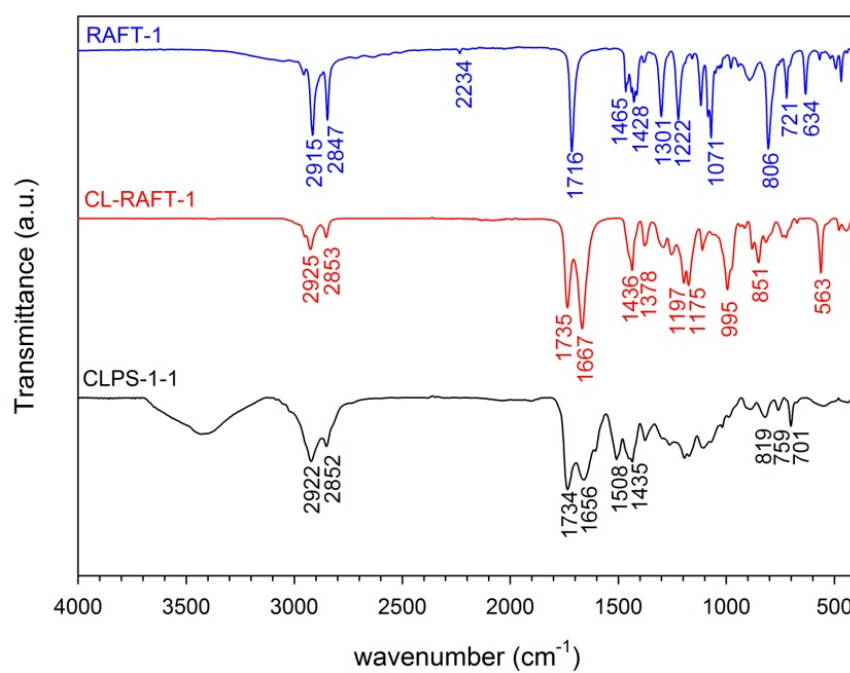

Figure S1. IR spectrum of CL-RAFT-1, compared to that of RAFT-1 and CLPS-1-1

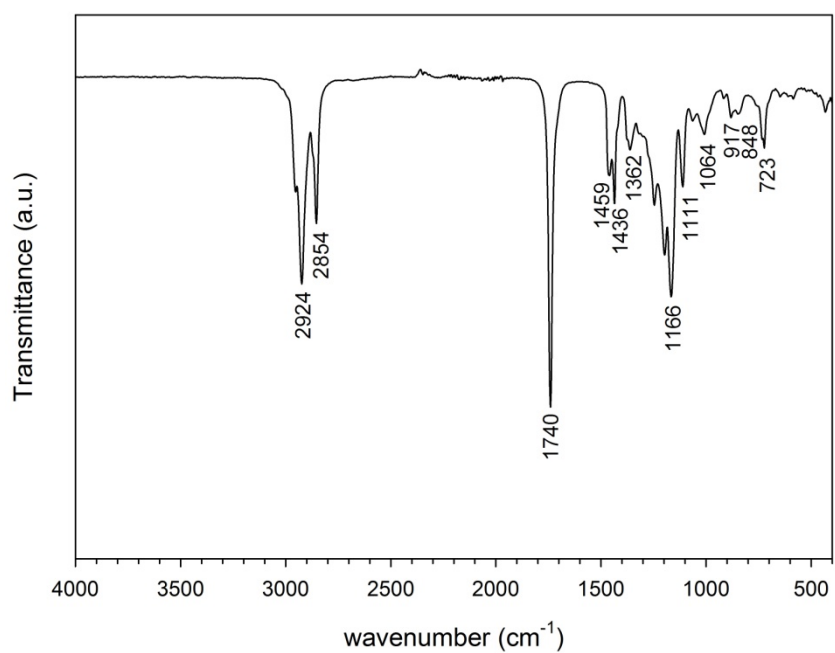

**Figure S2.** IR spectrum of product of Friedel-Craft reaction of decanoic acid

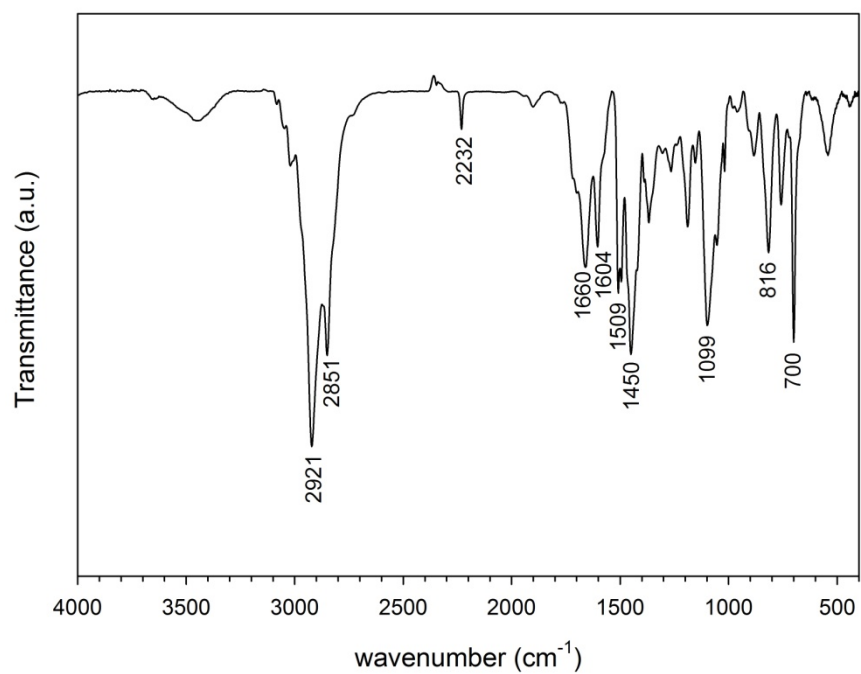

**Figure S3.** IR spectrum of CLPS<sub>4-1</sub>
